# Supplementary material
Source: PubMed Central journal article supplement (PMC2947399)

## **Legends to Supplementary Material**

**Supplementary Figure 1:** Comparisons of heart measures to tibia length. Tibia lengths (TL) were found to be significantly smaller in SMA mice at both 7- (A) and 14-day (B) time points. Heart weight to tibia length ratio (HW:TL) in 7- (C) and 14-day-old (D) mice. HW:TL values are decreased in SMA mice of both 7-day-old (p7 WT:  $6.29 \pm 0.0028$ mg/mm vs. p7 SMA:  $5.65 \pm 0.21$ ,  $p=0.099$ ) and 14-day-old (p14 WT:  $4.55 \pm 0.75$ mg/mm vs. p14 SMA:  $3.95 \pm 0.032$ mg/mm,  $p=0.36$ ).

**Supplementary Figure 2:** Cardiomyocyte diameter in 14-day-old mice. Cardiac myocyte diameter was mildly, but not significantly increased in 14-day-old (A) SMA mice (WT:  $9.63 \pm 0.38$  $\mu$ m, vs. p14 SMA:  $11.83 \pm 1.50$  $\mu$ m,  $p=0.34$ ).

**Supplementary Figure 3:** Examples of echocardiographic images and analysis from p14 wild type, SMA and scAAV9-treated mice.

**Supplementary Video 1:** Wild type mouse, B-mode, slowed to  $\frac{1}{4}$  speed. Best viewed with Apple QuickTime player.

**Supplementary Video 2:** SMA mouse, B-mode, slowed to  $\frac{1}{4}$  speed. Best viewed with Apple QuickTime player.

**Supplementary Video 3:** scAAV9-SMN-injected mouse, B-mode, slowed to  $\frac{1}{4}$  speed. Best viewed with Apple QuickTime player.

**Supplementary Figure 1:**

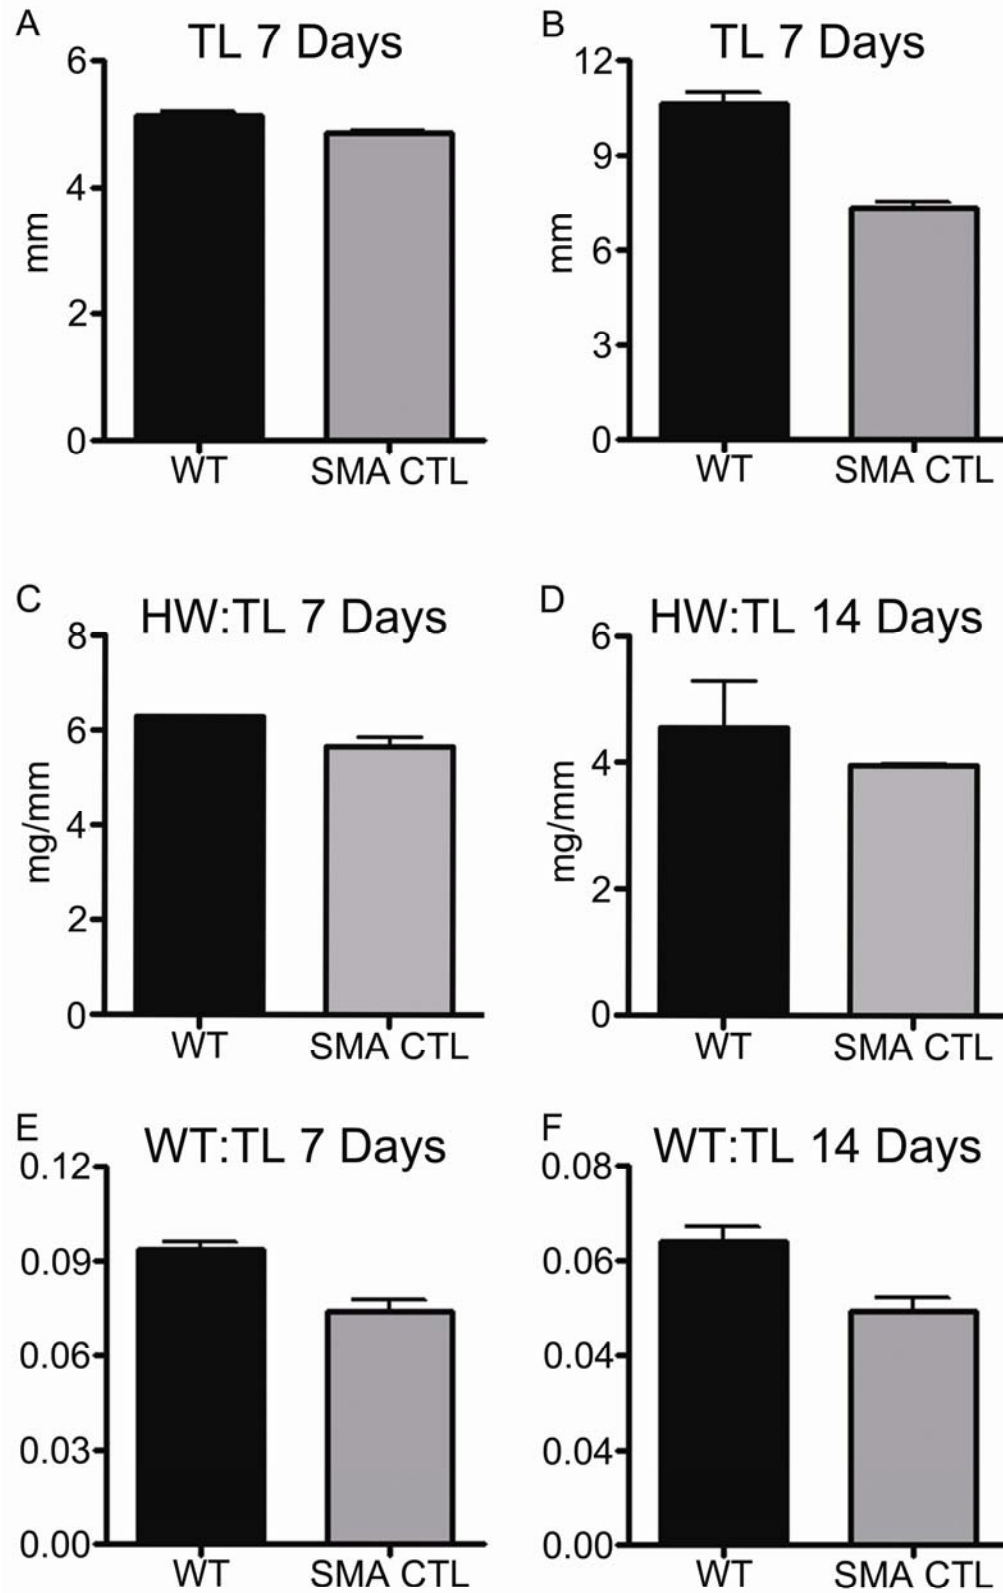

**Supplementary Figure 2:**

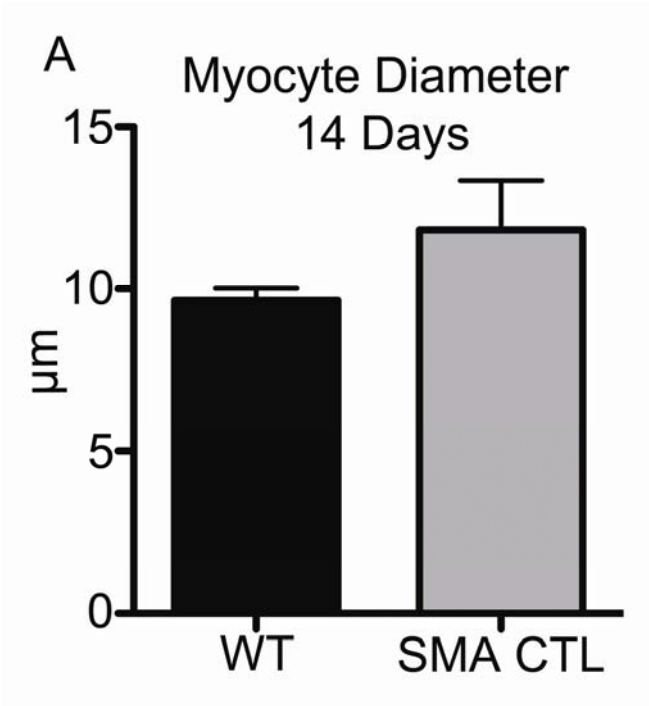

### Supplementary Figure 3:

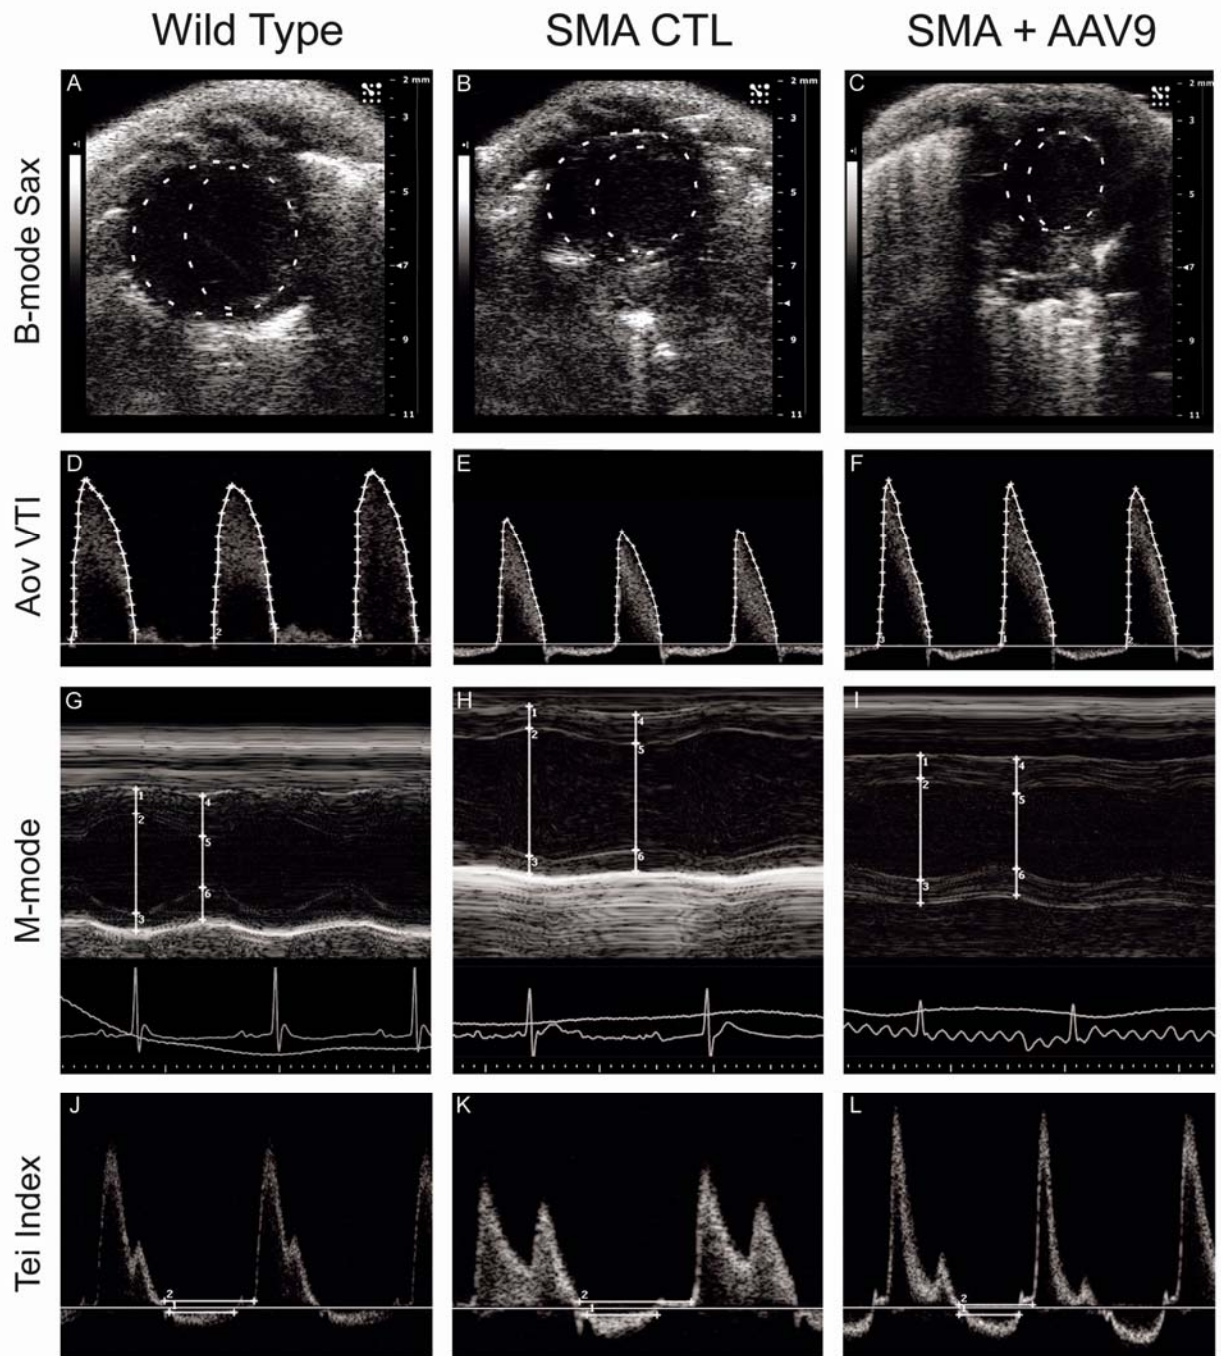

Supplement: supp_ddq300_ddq300supp.pdf [file supp_ddq300_ddq300supp.pdf]
